# Supplementary material for: Role of Copeptin and hs-cTnT to Discriminate AHF from Uncomplicated NSTE-ACS with Baseline Elevated hs-cTnT—A Derivation and External Validation Study
Source: MDPI journal article supplement (doi:10.3390/cells12071062), 2023-03-31
Supplement: s1 [file s1]

## Supplement Material

**Figure S1. Consort diagram validation cohort**

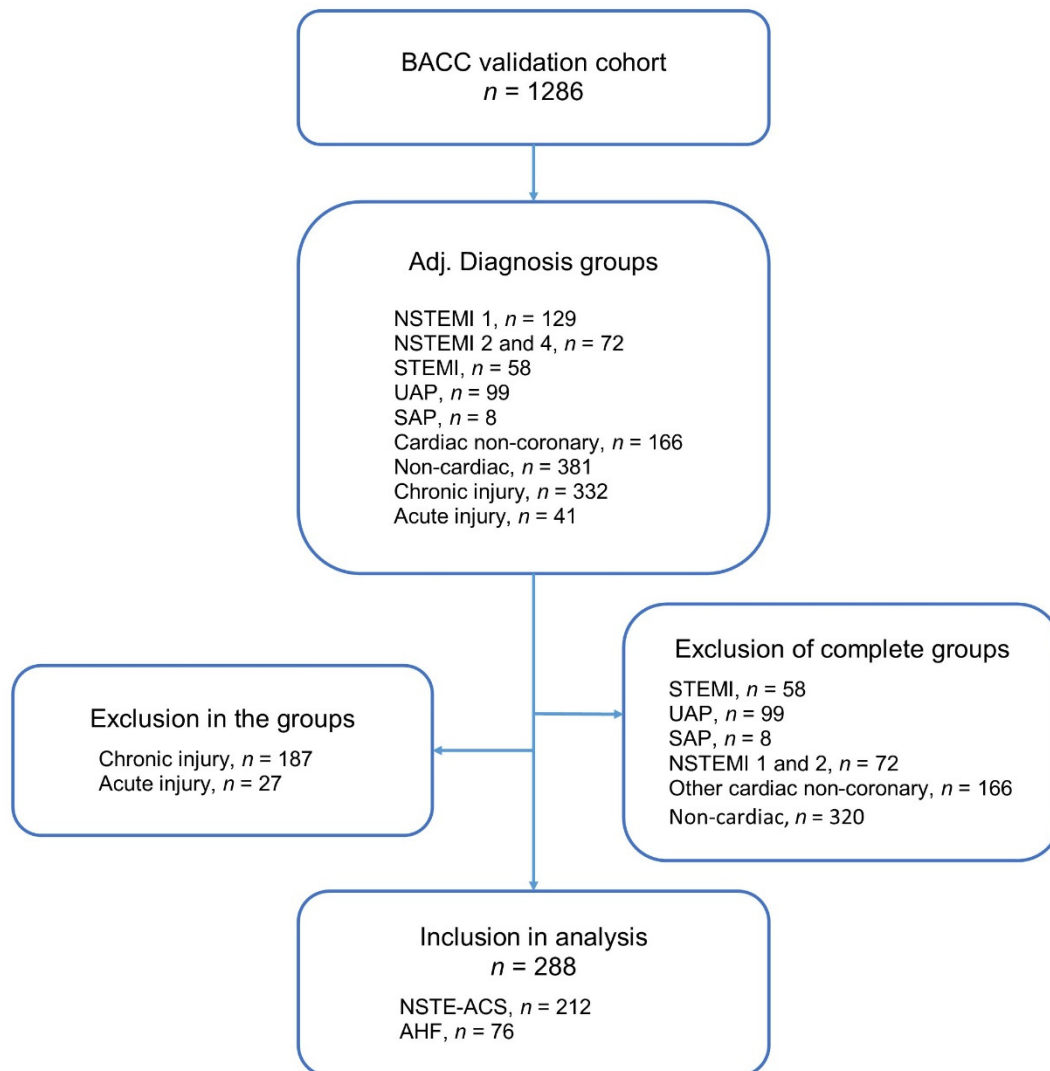

**Figure S2. A) ROC Comparison of discriminatory ability of Copeptin, hs-cTnT at 0 h and hs-cTnT at 3 hours at validation cohort. B) ROC Comparison of discriminatory ability of hs-cTnT as maximal concentration and concentration change at validation cohort**

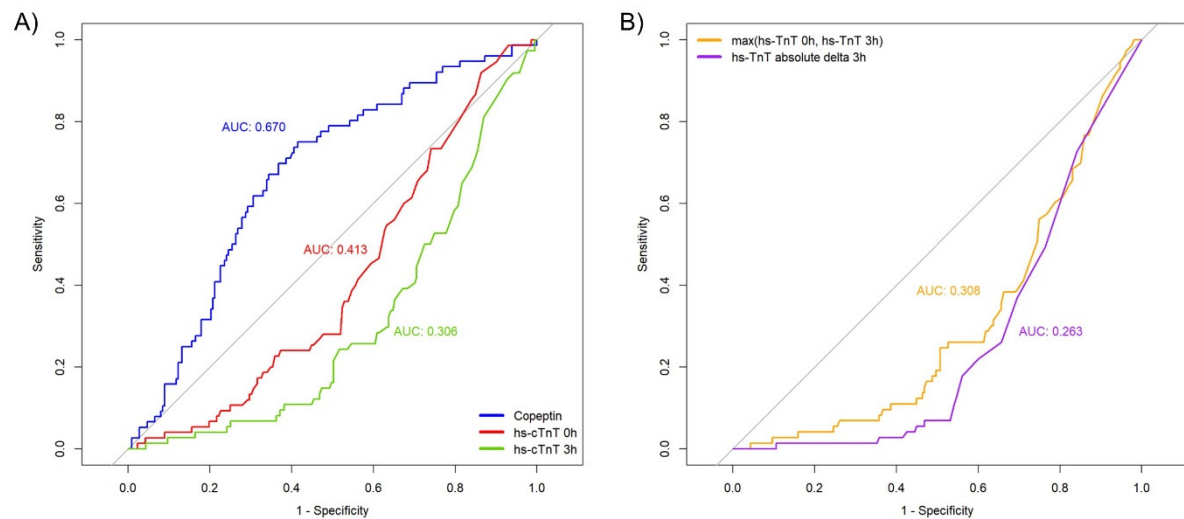

**Figure S3A. Kaplan-Meier curves, Copeptin  $\leq 45$  vs.  $>45$  pmol/L by all-cause death at 365 days**

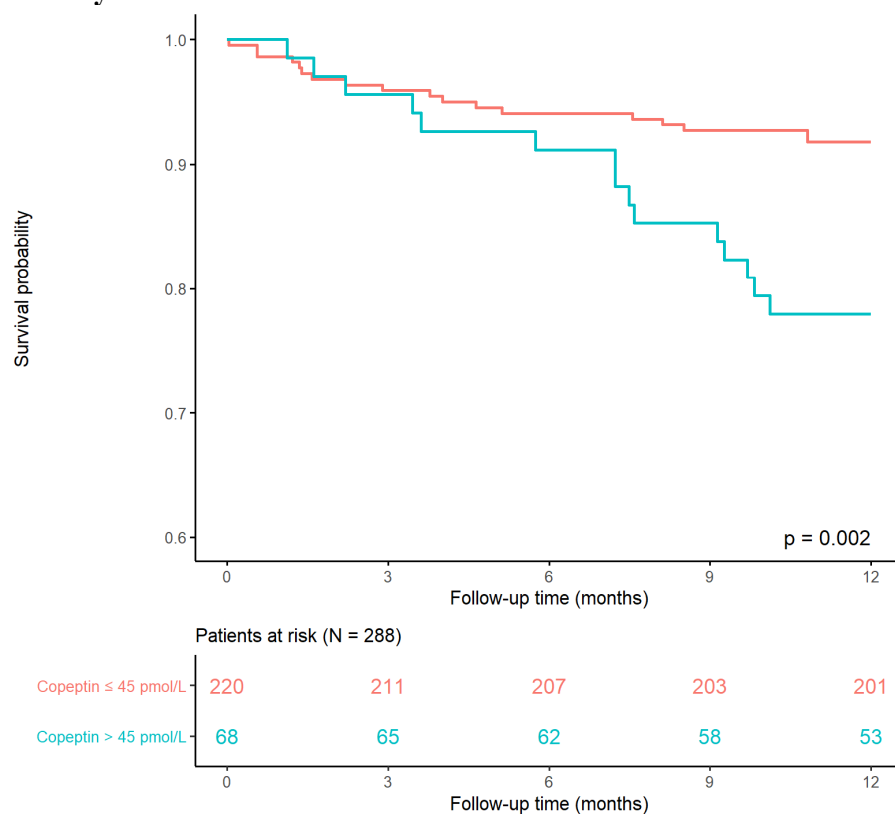

**Figure S3B. Kaplan-Meier curves, hs-cTnT at 0h  $\leq 74$  vs.  $>74$  ng/L by all-cause death at 365 days**

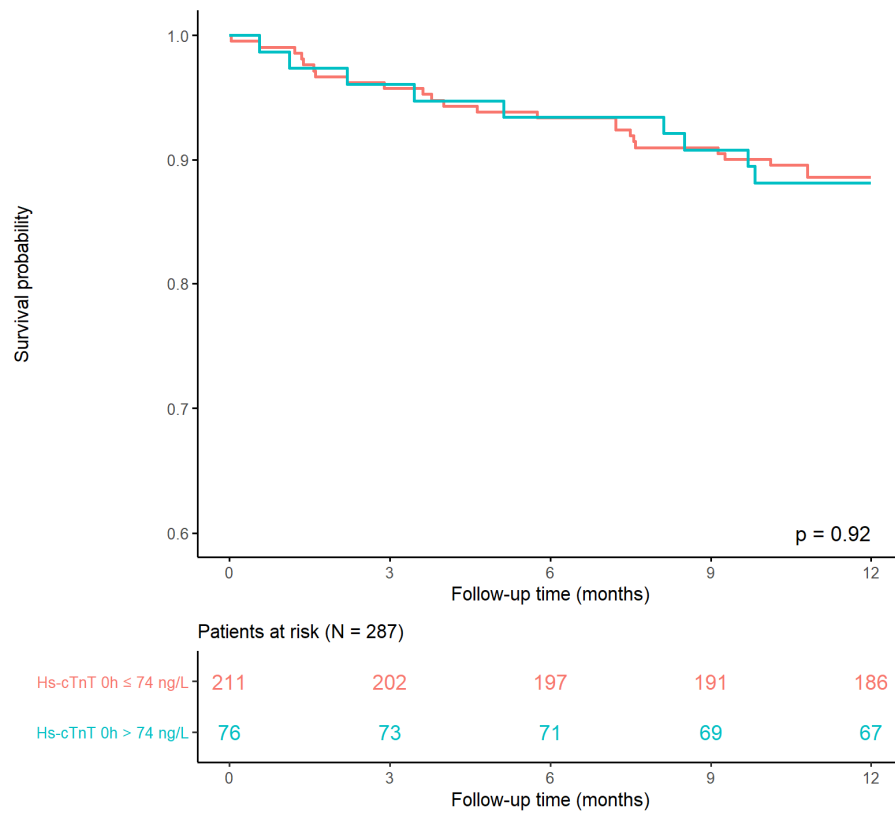

**Figure S3C. Kaplan-Meier curves, hs-cTnT at 3h  $\leq$ 78 vs.  $>$ 78 ng/L by all-cause death at 365 days**

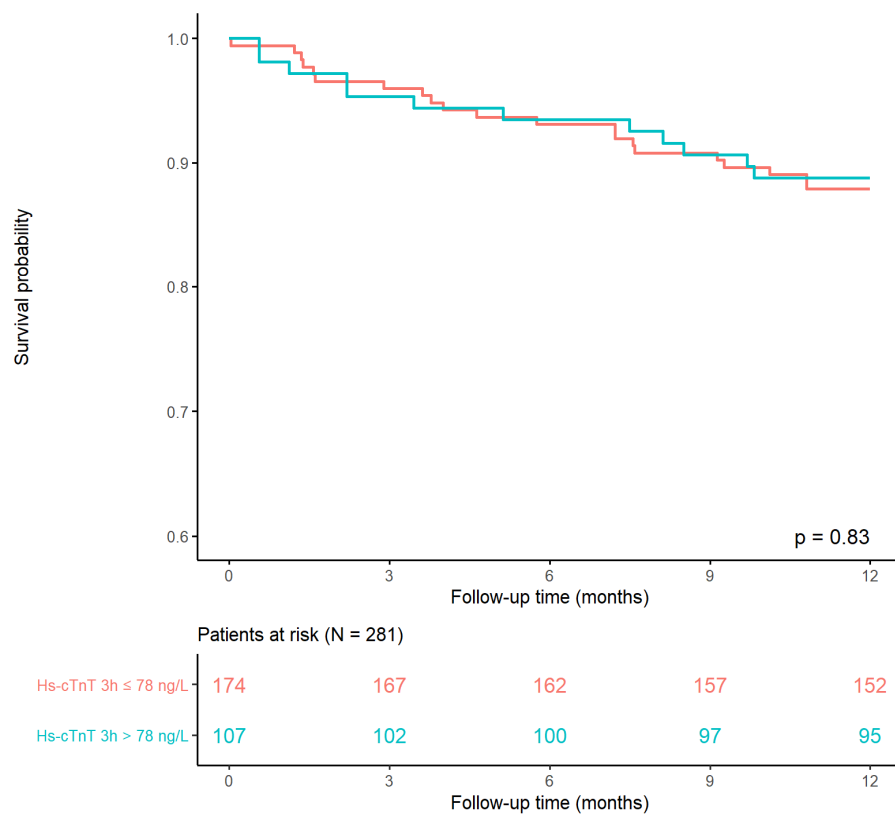

**Table S1. Baseline characteristics and laboratory values in validation cohort**

|                                          | All Patients<br>(n=288) | Acute HF<br>(n=76)  | NSTE-ACS<br>(n=212) | p-value |
|------------------------------------------|-------------------------|---------------------|---------------------|---------|
| Age                                      | 72.0 (60.8-78.0)        | 73.0 (65.8-80.2)    | 71.0 (60.0-78.0)    | 0.14    |
| Age > 75 years                           | 101 (35.1)              | 31 (40.8)           | 70 (33.0)           | 0.28    |
| Male (%)                                 | 201 (69.8)              | 53 (69.7)           | 148 (69.8)          | 1.00    |
| eGFR (ml/min/1.73m <sup>2</sup> )        | 64.4 (46.2-80.8)        | 48.6 (33.5-70.1)    | 69.7 (51.1-85.1)    | <0.001  |
| eGFR < 60 ml/min/1.73m <sup>2</sup>      | 130 (45.5)              | 51 (67.1)           | 79 (37.6)           | <0.001  |
| eGFR < 30 ml/min/1.73m <sup>2</sup>      | 27 (9.4)                | 14 (18.4)           | 13 (6.2)            | 0.0038  |
| <b>CV Risk</b>                           |                         |                     |                     |         |
| Hypertension, No. (%)                    | 245 (85.4)              | 70 (92.1)           | 175 (82.9)          | 0.080   |
| Diabetes mellitus, No. (%)               | 73 (25.4)               | 23 (30.7)           | 50 (23.6)           | 0.29    |
| Hypercholesterolemia, No. (%)            | 180 (62.5)              | 48 (63.2)           | 132 (62.3)          | 1.00    |
| <b>Chief complaint</b>                   |                         |                     |                     |         |
| Chest Pain 48h before admission, No. (%) | 226 (78.5)              | 44 (57.9)           | 182 (85.8)          | <0.001  |
| Dyspnea, No. (%)                         | 123 (44.9)              | 52 (69.3)           | 71 (35.7)           | <0.001  |
| <b>Medical history</b>                   |                         |                     |                     |         |
| History of AMI No. (%)                   | 91 (31.7)               | 21 (27.6)           | 70 (33.2)           | 0.46    |
| History of CAD/Bypass/PCI No. (%)        | 177 (61.5)              | 43 (56.6)           | 134 (63.2)          | 0.38    |
| History of PAD No. (%)                   | 30 (10.4)               | 8 (10.5)            | 22 (10.4)           | 1.00    |
| History of HF No. (%)                    | 100 (34.7)              | 59 (77.6)           | 41 (19.3)           | <0.001  |
| GRACE score                              | 125.0 (103.0-148.2)     | 149.0 (131.8-166.0) | 117.5 (95.8-136.0)  | <0.001  |
| <b>Laboratory</b>                        |                         |                     |                     |         |
| Copeptin (pmol/L)                        | 13.4 (5.5-41.5)         | 27.2 (12.8-59.9)    | 9.6 (4.9-28.0)      | <0.001  |
| Hs-cTnT 0 h (ng/L)                       | 32.0 (18.0-87.0)        | 27.0 (17.0-42.0)    | 38.0 (18.0-120.5)   | 0.025   |
| Hs-cTnT 3 h (ng/L)                       | 48.0 (22.0-153.0)       | 26.0 (17.0-50.2)    | 67.0 (24.5-201.0)   | <0.001  |
| Hs-cTnT delta                            | 5.5 (2.0-32.0)          | 2.0 (1.0-5.0)       | 10.0 (3.0-55.0)     | <0.001  |
| Maximum hs-cTnT                          | 41.0 (21.0-106.0)       | 27.0 (18.0-52.0)    | 50.0 (24.0-156.2)   | <0.001  |

**Table S2. Cox regression models in validation cohort**

|                         | Univariate Model |         | Multivariate Model 1* |         | Multivariate Model 2** |         |
|-------------------------|------------------|---------|-----------------------|---------|------------------------|---------|
|                         | HR (95% CI)      | p-value | HR (95% CI)           | p-value | HR (95% CI)            | p-value |
| <b>Copeptin (log)</b>   | 1.54(1.21-1.96)  | <0.001  | 1.37 (1.06-1.77)      | 0.017   | 1.37 (1.06-1.78)       | 0.017   |
| <b>Hs-cTnT 0h (log)</b> | 1.19(0.92-1.53)  | 0.19    |                       |         | 1.20 (0.92-1.58)       | 0.180   |
| <b>Hs-cTnT 3h (log)</b> | 1.09(0.85-1.39)  | 0.52    |                       |         |                        |         |
| <b>Age</b>              | 1.07(1.04-1.11)  | <0.001  | 1.06 (1.02-1.10)      | 0.002   | 1.06 (1.02-1.10)       | 0.003   |
| <b>Male</b>             | 0.64(0.32-1.29)  | 0.21    | 0.90 (0.43-1.87)      | 0.78    | 0.89 (0.43-1.86)       | 0.750   |

\*Model 1 was adjusted for copeptin, age and sex. \*\*Model 2 was adjusted for copeptin, hs-cTnT, age and sex.
